# Supplementary material for: Mercury isotopes of atmospheric particle bound mercury for source apportionment study in urban Kolkata, India
Source: Oxford University Press journal article supplement (doi:10.12952/journal.elementa.000098), 2016-01-01
Supplement: elementa_000098_s001.docx [file elementa_000098_s001.docx]

Table S1. Agilent 7700 ICP-MS operating conditions for the analysis of PBM samples.

| Parameter | Value |
| --- | --- |
| Plasma mode | Normal, robust |
| RF forward power (W) | 1550 |
| Sampling depth (mm) | 8 |
| Carrier gas flow (L/min) | 0.95 |
| Dilution gas flow (L/min) | 0.15 |
| Spray chamber temperature (°C) | 2 |
| Extraction lens 1 (V) | 0 |
| Kinetic energy discrimination (V) | 4 |
| He cell gas flow (mL/min) | 4 |
