# Supplementary material for: Mercury isotopes of atmospheric particle bound mercury for source apportionment study in urban Kolkata, India
Source: Oxford University Press journal article supplement (doi:10.12952/journal.elementa.000098), 2016-01-01
Supplement: elementa_000098_s002.xlsx [file elementa_000098_s002.xlsx]

## Sheet: Sheet1
Table S2 - PBM sampling details along with the isotope ratios and trace metal concentrations.
Sample ID	Collection Date	AverageTemp	Average Humidity	Wind Direction	Total Hg extracted	PBM conc	PM10 Conc	n	d199Hg	2SD	d200Hg	2SD	d201Hg	2SD	d202Hg	2SD	D199Hg	2SD	D200Hg	2SD	D201Hg	2SD	Ni	Cu	Zn	As	Pb
		oC	%		ng	ng/m3	µg/m3		‰		‰		‰		‰		‰		‰		‰		ng/m3	ng/m3	ng/m3	ng/m3	ng/m3
Waste-Winter
W-1	28th Nov-14 to 30th Nov-14	22	66	NNW	5.7024	0.198	280	1	-0.0180093	0.1	-0.171952	0.08	-0.256888	0.12	-0.39485	0.14	0.081493	0.09	0.0262631	0.06	0.0400395	0.11	29.55	57.62	840.98	2.44	224
W-2	1st Dec-14 to 3rd Dec-14	22	71	NW	7.6032	0.264	298	1	-0.00358414	0.1	-0.21411	0.08	-0.243104	0.12	-0.474327	0.14	0.115946	0.09	0.0240022	0.06	0.113589	0.11	171.43	72.06	520.12	9.3	286.48
W-3	3rd Dec-14 to 5th Dec-14	23	76	NNW	5.1264	0.178	248	1	-0.106903	0.1	-0.23995	0.08	-0.353479	0.12	-0.518559	0.14	0.0237739	0.09	0.0203669	0.06	0.0364766	0.11	34.44	36.59	260.43	11.7	117.71
W-4	5th Dec-14 to 7th Dec-14	22	80	N	8.208	0.285	300	1	-0.0636885	0.1	-0.260764	0.08	-0.36526	0.12	-0.550155	0.14	0.0749506	0.09	0.0154143	0.06	0.0484567	0.11	73.97	43.05	525.09	0.57	157.24
Waste - Monsoon
W-5	30th July-15 to 1st Aug-15	28	92	SW	3.87	0.129	198	1	-0.0954574	0.1	-0.289553	0.08	-0.522382	0.12	-0.726961	0.14	0.0877366	0.09	0.0753815	0.06	0.0242924	0.11	52.08	86.42	447.78	3.54	31.02
W-6	2nd Aug-15 to 4th Aug-15	29	86	SW	4.5504	0.158	219	1	-0.0885647	0.1	-0.271741	0.08	-0.303755	0.12	-0.520329	0.14	0.0425582	0.09	-0.0105357	0.06	0.0875319	0.11	51.14	28.16	349.26	<DL	42.85
W-7	4th Aug-15 to 6th Aug-15	31	80	SE	3.5424	0.123	178	1	-0.268068	0.1	-0.289614	0.08	-0.565807	0.12	-0.633969	0.14	-0.108307	0.09	0.0286384	0.06	-0.0890623	0.11	52.93	59.94	546.62	<DL	60.93
W-8	6th Aug-15 to 8th Aug-15	31	93	SSW	5.3856	0.187	132	1	-0.218361	0.1	-0.370057	0.08	-0.479911	0.12	-0.715202	0.14	-0.0381303	0.09	-0.011025	0.06	0.0579207	0.11	69.1	45.2	307.05	8.93	65.66
W-9	8th Aug-15 to 10th Aug-15	31	75	S	5.7024	0.198	321	1	-0.21612	0.1	-0.319953	0.08	-0.554683	0.12	-0.781565	0.14	-0.0191658	0.09	0.0723927	0.06	0.0330543	0.11	48.21	44.72	271.36	3.87347	155.817
Industry-Winter
In-1	14th Dec-13 to 15th Dec-13	19.5	65	NNW	9.9792	0.462	339	3	-0.393414	0.08	-0.697737	0.08	-1.17513	0.12	-1.49751	0.16	-0.0160414	0.06	0.0540122	0.07	-0.0490025	0.12	41.73	103.41	769.46	14.93	143.6
In-2	16th Dec-13 to 17th Dec-13	20	68.5	NNE	10.4328	0.483	337	3	-1.01319	0.08	-1.45787	0.09	-2.50745	0.03	-2.99379	0.18	-0.258752	0.11	0.0450136	0.08	-0.25612	0.12	14.16	48.95	443.57	18.53	178.73
In-3	19th Dec-13 to 20th Dec-13	20	76	NNE to SE	7.5168	0.348	239	1	-0.908106	0.1	-1.15489	0.08	-1.99701	0.12	-2.38159	0.14	-0.307947	0.09	0.0406701	0.06	-0.206055	0.11	12.9	50	771.49	10.52	120
In-4	20th Dec-13 to 22nd Dec-13	21.5	77	SE	4.8384	0.224	267	1	-0.683431	0.1	-0.745074	0.08	-1.49088	0.12	-1.59372	0.14	-0.281814	0.09	0.0549723	0.06	-0.292402	0.11	11.2	93	823.28	11.0973	97.65
In-5	7th Dec-14 to 8th Dec-14	20	81.5	NNW	6.8904	0.319	244	1	-0.942515	0.1	-1.5046	0.08	-2.41178	0.12	-3.0113	0.14	-0.183668	0.09	0.0070746	0.06	-0.147287	0.11	27.89	29.01	161.28	10.02	98.54
In-6	8th Dec-14 to 10th Dec-14	20	76	NW	7.2144	0.334	228	1	-0.960417	0.1	-1.68513	0.08	-2.6491	0.12	-3.48032	0.14	-0.0833765	0.09	0.0619901	0.06	-0.031903	0.11	13.09	26	310.12	9.01	127.97
In-7	11th Dec-14 to 12th Dec-14	19.5	78	N	5.8104	0.269	319	1	-0.953191	0.1	-1.67895	0.08	-2.68948	0.12	-3.46535	0.14	-0.0799235	0.09	0.0606571	0.06	-0.0835403	0.11	9.73	19.4	204.01	13.97	122.34
In-8	13th Dec-14 to 14th Dec-14	20	74.5	NNW	6.4368	0.298	333	1	-0.848052	0.1	-1.40147	0.08	-2.26406	0.12	-2.77633	0.14	-0.148416	0.09	-0.00774683	0.06	-0.176255	0.11	29.94	31.34	178.66	14.753	147.84
In-9	16th Dec-14 to 17th Dec-14	21	70.5	NNW	6.1128	0.283	217	1	-0.699895	0.1	-0.85396	0.08	-1.61396	0.12	-1.83786	0.14	-0.236755	0.09	0.0686436	0.06	-0.231889	0.11	4.48	26.76	245.36	8.14	102.55
In-10	18th Dec-14 to 19th Dec-14	19	70	N	7.1496	0.331	339	1	-0.743287	0.1	-0.844849	0.08	-1.71318	0.12	-1.85822	0.14	-0.275016	0.09	0.0879764	0.06	-0.315798	0.11	7.21	31.37	186.92	14.09	108.92
In-11	19th Dec-14 to 20th Dec-14	19.5	70.5	N	7.4088	0.343	318	1	-0.401394	0.1	-0.704707	0.08	-0.991971	0.12	-1.33677	0.14	-0.0645275	0.09	-0.0336472	0.06	0.0132823	0.11	16.99	105.71	186.34	11.56	99.75
Industry-Monsoon
In-12	8th July-14 to 10th July-14	31	82.5	S to SE	5.6448	0.196	250	1	-0.410492	0.1	-0.853868	0.08	-1.22018	0.12	-1.65523	0.14	0.00662612	0.09	-0.0229433	0.06	0.0245507	0.11	24.59	26.7	406.49	7.32	78.5365
In-14	11th July-14 to 13th July-14	31	84	E	3.8304	0.133	137	1	-0.742515	0.1	-1.1046	0.08	-1.69178	0.12	-2.1113	0.14	-0.210468	0.09	-0.0447254	0.06	-0.104087	0.11	16.82	33.78	531.06	7.99	108.568
In-15	26th July-14 to 28th July-14	30	85	E	6.0768	0.211	183	1	-0.70161	0.1	-1.30262	0.08	-2.00643	0.12	-2.67297	0.14	-0.0280224	0.09	0.0392129	0.06	0.00364058	0.11	9.01	43.97	498.73	6.99623	98.8025
In-16	29th July-14 to 31st July-14	30	87	E to SE	3.5136	0.122	161	1	-0.860417	0.1	-1.18513	0.08	-1.9991	0.12	-2.48032	0.14	-0.235377	0.09	0.0599901	0.06	-0.133903	0.11	17.1243	47.3	239.84	4.69969	76.2765
In-17	2nd Aug-14 to 4th Aug-14	30	85	SE	4.0032	0.139	217	1	-0.953191	0.1	-1.51895	0.08	-2.61948	0.12	-3.16535	0.14	-0.155523	0.09	0.0700571	0.06	-0.23914	0.11	6.3	28.64	349.81	10.8353	114.099
Traffic-Winter
TJ-1	23rd Dec-13 to 24th Dec-13	22	70.5	NNW	10.746	0.597	418	3	-0.51035	0.07	-0.382997	0.11	-0.8822	0.1	-0.842389	0.08	-0.298069	0.05	0.0398825	0.09	-0.248724	0.07	58.4259	73.82	694.5	8.55033	34.46
TJ-2	26th Dec-13 to 28th Dec-13	18	72	N	6.966	0.387	296	1	-0.618079	0.1	-0.658373	0.08	-1.33887	0.12	-1.49056	0.14	-0.242458	0.09	0.0898878	0.06	-0.217974	0.11	56.2925	59.61	485.85	6.97738	25.84
TJ-3	27th Dec-13 to 28th Dec-13	18.5	72	NW	7.524	0.418	367	1	-0.0786166	0.1	-0.0794547	0.08	-0.170543	0.12	-0.298715	0.14	-0.00334046	0.09	0.0705001	0.06	0.0540906	0.11	37.1746	106.62	603.16	4.82224	43
TJ-4	28th Dec-13 to 29th Dec-13	19	72.5	W to NNE	6.912	0.384	316.667	1	-0.376249	0.1	-0.13295	0.08	-0.592026	0.12	-0.441106	0.14	-0.26509	0.09	0.0884854	0.06	-0.260315	0.11	76.6239	102.58	585.19	5.09872	108.3
TJ-5	30th Dec-13 to 31st Dec-13	18.5	73	N	5.022	0.279	277.778	1	-0.29455	0.1	-0.0972064	0.08	-0.344856	0.12	-0.219798	0.14	-0.23916	0.09	0.0131321	0.06	-0.179568	0.11	56.7553	109.59	795.68	5.06117	72.89
TJ-6	4th Jan-14 to 5th Jan-14	17.5	68	NW	7.146	0.397	277.778	1	-0.167921	0.1	-0.0666232	0.08	-0.366649	0.12	-0.122425	0.14	-0.13707	0.09	-0.00516591	0.06	-0.274585	0.11	61.546	105.92	892.59	5.727	162.91
TJ-7	5th Jan-14 to 6th Jan-14	17.5	72.5	NW	5.796	0.322	283	1	-0.74521	0.1	-1.00356	0.08	-1.72324	0.12	-1.90223	0.14	-0.265849	0.09	-0.0486469	0.06	-0.292767	0.11	113.641	169.04	407.11	3.85462	204.36
TJ-8	7th Jan-14 to 8th Jan-14	17.5	70.5	N	8.01	0.445	420	1	-0.832068	0.1	-1.46127	0.08	-2.38477	0.12	-3.05589	0.14	-0.0619825	0.09	0.0727924	0.06	-0.0867351	0.11	48.1107	135.69	477.76	4.57385	66.98
TJ-9	9th Jan-14 to 10th Jan-14	17	68.5	N	8.568	0.476	366.667	1	-0.449616	0.1	-1.14923	0.08	-1.74237	0.12	-2.43575	0.14	0.164194	0.09	0.0735151	0.06	0.0893193	0.11	44.3599	166.36	497.78	3.90174	43.69
TJ-10	20th Jan-15 to 21st Jan-14	19	79.5	N	8.46	0.47	426.667	1	-0.338216	0.1	-0.922501	0.08	-1.29823	0.12	-1.94618	0.14	0.152222	0.09	0.0544826	0.06	0.165295	0.11	69.9819	242.76	794.11	6.32387	73.74
TJ-11	23rd Jan-15 to 24th Jan-14	19	69.5	NNW	4.284	0.238	302.222	1	-0.218514	0.1	-0.68706	0.08	-1.06672	0.12	-1.51523	0.14	0.163324	0.09	0.0735855	0.06	0.0727381	0.11	89.3429	49.5	175.32	4.99623	213.01
TJ-12	29th Dec-14 to 30th Dec-14	18	71	N	7.542	0.419	418	1	-0.45885	0.1	-0.674388	0.08	-1.18491	0.12	-1.27682	0.14	-0.137091	0.09	-0.0334231	0.06	-0.224734	0.11	65.71	69.29	295.38	3.34571	31.02
TJ-13	7th Jan-15 to 8th Jan-15	18.5	75	NNW	5.688	0.316	266.667	1	-0.21573	0.1	-0.515469	0.08	-0.86776	0.12	-1.13968	0.14	0.0714703	0.09	0.056652	0.06	-0.0107182	0.11	89.3434	122.171	425.593	2.74884	82.85
TJ-14	10th Jan-15 to 11th Jan-15	17..5	77	N	7.614	0.423	433.333	1	-0.312922	0.1	-0.962736	0.08	-1.3419	0.12	-1.94162	0.14	0.176365	0.09	0.0119553	0.06	0.118197	0.11	50.79	149.174	283.582	5.07673	126
TJ-15	14th Jan-2015 to 15th Jan-15	18.5	75	N	8.334	0.463	416.111	1	-0.0897533	0.1	-0.49008	0.08	-0.566529	0.12	-1.14686	0.14	0.199255	0.09	0.0856422	0.06	0.295909	0.11	41.12	49.2336	436.058	4.86622	29.45
TJ-16	17th Jan-15 to 18th Jan-15	18.5	69.5	NNW	8.388	0.466	361	1	-0.0603421	0.1	-0.205161	0.08	-0.124891	0.12	-0.300154	0.14	0.0152968	0.09	-0.0544836	0.06	0.100825	0.11	36.15	49.65	595.42	6.83527	50.52
TJ-17	19th Jan-15 to 20th Jan-15	17	79	N	7.758	0.431	344.444	1	-0.597104	0.1	-0.61614	0.08	-1.19439	0.12	-1.29829	0.14	-0.269935	0.09	0.0356022	0.06	-0.218074	0.11	29.55	43.68	620.69	7.09731	53.17
Traffic-Monsoon
TJ-18	3rd July-14 to 4th July-14	29	92.5	SSE to SSW	6.966	0.387	292.222	1	-0.473828	0.1	-1.52873	0.08	-2.14774	0.12	-3.18073	0.14	0.327715	0.09	0.0679967	0.06	0.244172	0.11	34.96	37.37	575.08	4.82852	38.01
TJ-19	6th July-14 to 7th July-14	30.5	82	S	7.092	0.394	258.889	1	-0.932068	0.1	-1.49127	0.08	-2.38477	0.12	-3.05589	0.14	-0.161982	0.09	0.0427924	0.06	-0.0867351	0.11	43.34	40.5	377.98	4.68716	67.17
TJ-20	14th July-14 to 15th July-14	30	87	SE	5.184	0.288	228	1	-0.00599184	0.1	-0.0392266	0.08	-0.15468	0.12	-0.188678	0.14	0.0415549	0.09	0.0554895	0.06	-0.012795	0.11	45.56	47.61	615.11	1.80635	56.32
TJ-21	16th July-14 to 17th July-14	29	88.5	SSE	8.424	0.468	344.444	1	-0.687701	0.1	-1.26066	0.08	-1.9619	0.12	-2.52423	0.14	-0.0515941	0.09	0.00650116	0.06	-0.0636719	0.11	33.69	44.69	601.32	3.87347	48.85
TJ-22	18th July-14 to 19th July-14	30.5	84.5	SE	7.542	0.419	294.444	1	-0.227375	0.1	-0.525778	0.08	-0.669739	0.12	-0.991596	0.14	0.0225075	0.09	-0.0279964	0.06	0.0759414	0.11	32.64	94.5	183.54	2.84936	29.45
TJ-23	20th July-14 to 21st July-14	29	89	NE to SE	4.968	0.276	211.111	1	-0.422753	0.1	-0.957973	0.08	-1.48251	0.12	-1.97043	0.14	0.0737964	0.09	0.0311846	0.06	-0.000744191	0.11	65.27	44.86	331.67	2.34988	25.31
TJ-24	22nd July-14 to 23rd July-14	29.5	87	SE	6.138	0.341	368.889	1	-0.158514	0.1	-0.73706	0.08	-1.00072	0.12	-1.51523	0.14	0.223324	0.09	0.0235855	0.06	0.138738	0.11	25.68	43.34	213.91	3.83263	62.98
TJ-25	27th June-15 to 28th June-15	27	92	SSW	6.732	0.374	286	1	-0.482912	0.1	-1.55954	0.08	-2.16503	0.12	-3.10048	0.14	0.298409	0.09	-0.00310363	0.06	0.166536	0.11	60.58	67.71	365.43	4.4105	53.25
TJ-26	29th June-15 to 30th June-15	30.5	84.5	SSE	5.868	0.326	316.667	1	-0.208492	0.1	-0.276557	0.08	-0.700475	0.12	-0.729107	0.14	-0.0247567	0.09	0.0894554	0.06	-0.152186	0.11	48.24	27.73	179.79	4.40751	36.75
TJ-27	1st July-15 to 2nd July-15	28.5	86	S	7.488	0.416	411	1	-0.516651	0.1	-1.49202	0.08	-2.00865	0.12	-3.00759	0.14	0.241262	0.09	0.0177904	0.06	0.253057	0.11	15.91	46.59	193.91	3.86604	43.4
Triplicate Analysis		d199Hg	d200Hg	d201Hg	d202Hg	D199Hg	D200Hg	D201Hg
		‰	‰	‰	‰	‰	‰	‰
TJ-1A		-0.474653	-0.317391	-0.822463	-0.813375	-0.269683	0.0909234	-0.210804
TJ-1B		-0.539825	-0.424457	-0.919184	-0.888727	-0.315865	0.0216846	-0.250861
TJ-1C		-0.516574	-0.407143	-0.904954	-0.825064	-0.308658	0.00703936	-0.284506
TJ-1 Average		-0.51035	-0.382997	-0.8822	-0.842389	-0.298069	0.0398825	-0.248724
2SD		0.0660569	0.114944	0.104442	0.0811075	0.0496915	0.0896104	0.0737942
In - 1A		-0.434565	-0.709988	-1.23436	-1.58222	-0.0358443	0.0842881	-0.0445304
In - 1B		-0.392732	-0.651245	-1.18045	-1.42515	-0.033595	0.0641785	-0.108742
In - 1C		-0.352944	-0.731979	-1.11057	-1.48516	0.021315	0.01357	0.00626492
In-1 Average		-0.393414	-0.697737	-1.17513	-1.49751	-0.0160414	0.0540122	-0.0490025
2SD		0.0816286	0.083475	0.124132	0.158526	0.0647423	0.0728774	0.115267
In - 2A		-1.05163	-1.41758	-2.50216	-2.89484	-0.32213	0.0356334	-0.325241
In - 2B		-1.01161	-1.45342	-2.52643	-3.07297	-0.237222	0.0892134	-0.215559
In - 2C		-0.976321	-1.50262	-2.49376	-3.01357	-0.216902	0.0101941	-0.22756
In-2 Average		-1.01319	-1.45787	-2.50745	-2.99379	-0.258752	0.0450136	-0.25612
2SD		0.0753579	0.0853904	0.0339292	0.181393	0.11164	0.0806723	0.120321
