# Supplementary material for: Mercury isotopes of atmospheric particle bound mercury for source apportionment study in urban Kolkata, India
Source: Oxford University Press journal article supplement (doi:10.12952/journal.elementa.000098), 2016-01-01
Supplement: elementa_000098_s003.docx [file elementa_000098_s003.docx]

Table S3. Isotope ratios of 1.2 ppb UM-Almaden standard measured during the course of analyses.

|  |  | **δ199Hg** | **δ200Hg** | **δ201Hg** | **δ202Hg** |  | **Δ199Hg** | **Δ200Hg** | **Δ201Hg** |
| --- | --- | --- | --- | --- | --- | --- | --- | --- | --- |
|  |  |  |  |  |  |  |  |  |  |
| UM 1 |  | -0.18 | -0.22 | -0.37 | -0.49 |  | -0.06 | 0.02 | -0.01 |
| UM 2 |  | -0.07 | -0.19 | -0.42 | -0.46 |  | 0.04 | 0.05 | -0.07 |
| UM 3 |  | -0.05 | -0.16 | -0.41 | -0.44 |  | 0.06 | 0.06 | -0.08 |
| UM 4 |  | -0.13 | -0.26 | -0.50 | -0.57 |  | 0.02 | 0.02 | -0.07 |
| UM 5 |  | -0.18 | -0.29 | -0.53 | -0.56 |  | -0.03 | -0.01 | -0.10 |
| UM 6 |  | -0.14 | -0.28 | -0.45 | -0.61 |  | 0.01 | 0.03 | 0.01 |
| UM 7 |  | -0.13 | -0.22 | -0.38 | -0.58 |  | 0.02 | 0.07 | 0.06 |
| UM 8 |  | -0.06 | -0.25 | -0.39 | -0.62 |  | 0.09 | 0.06 | 0.08 |
| UM 9 |  | -0.18 | -0.24 | -0.43 | -0.49 |  | -0.06 | 0.00 | -0.06 |
| UM 10 |  | -0.14 | -0.22 | -0.49 | -0.58 |  | 0.01 | 0.07 | -0.05 |
| UM 11 |  | -0.17 | -0.25 | -0.54 | -0.66 |  | 0.00 | 0.08 | -0.05 |
| UM 12 |  | -0.07 | -0.19 | -0.44 | -0.51 |  | 0.05 | 0.07 | -0.06 |
| **Average** |  | **-0.12** | **-0.23** | **-0.45** | **-0.55** |  | **0.01** | **0.04** | **-0.03** |
| **2SD** |  | **0.10** | **0.08** | **0.12** | **0.14** |  | **0.09** | **0.06** | **0.11** |
|  |  |  |  |  |  |  |  |  |  |
