# Supplementary material for: Mercury isotopes of atmospheric particle bound mercury for source apportionment study in urban Kolkata, India
Source: Oxford University Press journal article supplement (doi:10.12952/journal.elementa.000098), 2016-01-01
Supplement: elementa_000098_s004.docx [file elementa_000098_s004.docx]

Table S4. Correlation coefficients (r) among trace metals and PBM in PM10 from industrial site and traffic junction.

**Industrial Site**

|  | *PBM* | *Ni* | *Cu* | *Zn* | *As* | *Pb* |
| --- | --- | --- | --- | --- | --- | --- |
| PBM | 1 |  |  |  |  |  |
| Ni | 0.34 | 1 |  |  |  |  |
| Cu | 0.34 | 0.34 | 1 |  |  |  |
| Zn | 0.12 | 0.15 | **0.51** | 1 |  |  |
| As | **0.74** | 0.20 | 0.21 | 0.04 | 1 |  |
| Pb | **0.71** | 0.21 | 0.05 | 0.13 | **0.84** | 1 |

**Traffic Junction**

|  | *PBM* | *Ni* | *Cu* | *Zn* | *As* | *Pb* |
| --- | --- | --- | --- | --- | --- | --- |
| PBM | 1 |  |  |  |  |  |
| Ni | -0.38 | 1 |  |  |  |  |
| Cu | 0.19 | 0.44 | 1 |  |  |  |
| Zn | 0.31 | 0.05 | 0.32 | 1 |  |  |
| As | **0.55** | -0.05 | 0.07 | 0.47 | 1 |  |
| Pb | -0.39 | **0.66** | 0.34 | 0.02 | 0.03 | 1 |
