# Supplementary material for: Mercury isotopes of atmospheric particle bound mercury for source apportionment study in urban Kolkata, India
Source: Oxford University Press journal article supplement (doi:10.12952/journal.elementa.000098), 2016-01-01

Figure S1. Plot showing Hg(p) concentration vs. PM10 concentrations from the traffic junction, waste incineration and industrial site for both the seasons.


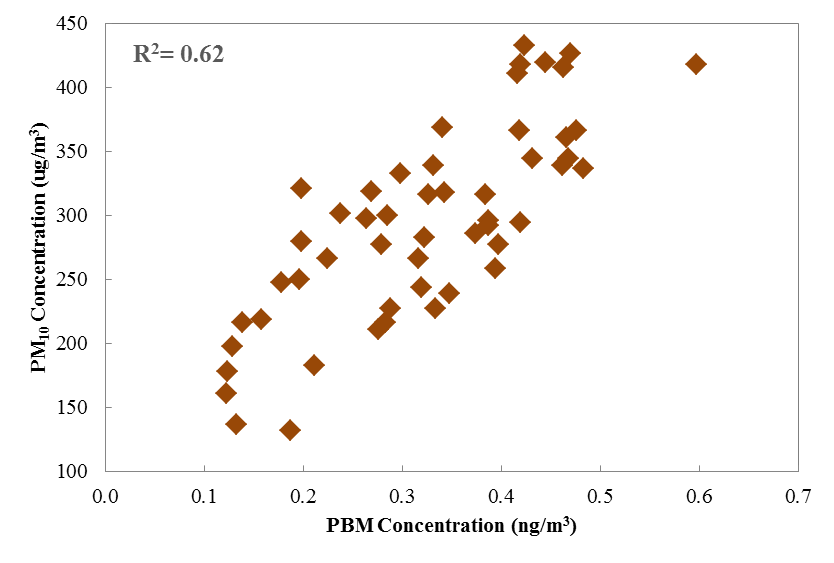

Supplement: elementa_000098_s005.docx [file elementa_000098_s005.docx]
